# Supplementary material for: Application of flower-like SnS2nanoparticles for direct electrochemistry of hemoglobin and its electrocatalysis
Source: Royal Society of Chemistry journal article supplement (doi:10.1039/c3ay41644e), 2013-10-22
Supplement: c3ay41644e.pdf [file c3ay41644e.pdf]

Electronic supplementary information(ESI):

### Application of flower-like SnS<sub>2</sub> nanoparticle for direct electrochemistry of hemoglobin and its electrocatalysis

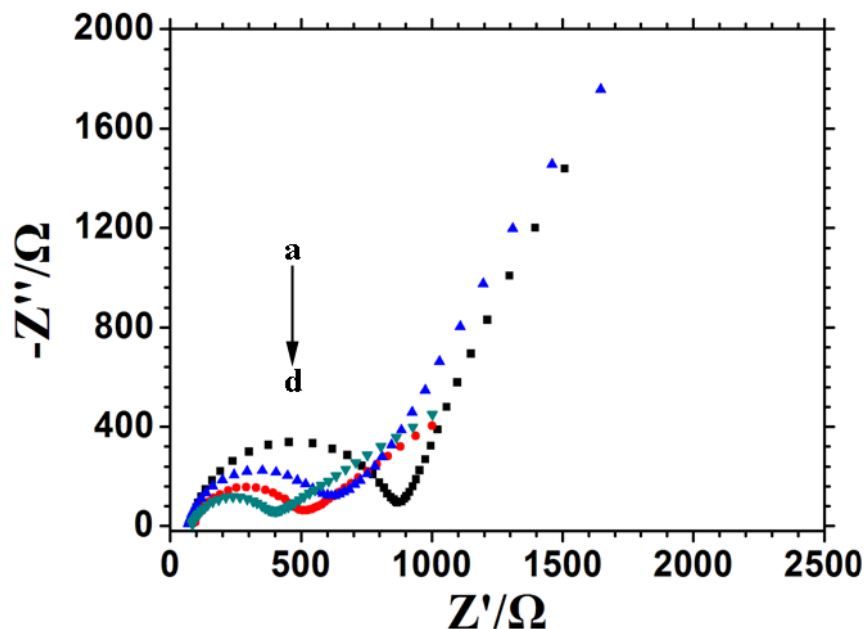

Fig.S1 EIS of (a) Nafion/Hb/GCE, (b) Nafion/Hb-SnS<sub>2</sub>/GCE, (c) Nafion/Hb-IL/GCE, (d) Nafion/Hb-SnS<sub>2</sub>-IL/GCE in the presence of 5.0 mmol L<sup>-1</sup> [Fe(CN)<sub>6</sub>]<sup>3-/4-</sup> and 0.1 mol L<sup>-1</sup> KCl with the frequencies ranging from 10<sup>5</sup> to 0.1 Hz.

Electrochemical impedance spectroscopy (EIS) is an effective method to monitor impedance change of the electrode surface during the modification process, which was performed in a solution mixture of 5.0 mmol L<sup>-1</sup> [Fe(CN)<sub>6</sub>]<sup>3-/4-</sup> and 0.1 mol L<sup>-1</sup> KCl with the frequency ranging swept from 10<sup>5</sup> to 0.1 Hz. The Nyquist plots of different modified electrodes are shown in Fig. S1 and the semicircle diameter equals the electron transfer resistance (Ret). For Nafion/Hb/GCE (curve a), the value of Ret was found to be 375.6 Ω. After the SnS<sub>2</sub> nanoflower introduced into the composite film, the Ret value of Nafion/Hb-SnS<sub>2</sub>/GCE (curve b) was recorded as 281.4 Ω, indicating that the presence of SnS<sub>2</sub> nanoflower contributed to enhance the interface conductivity of the composite film. It is mainly because the narrow bandgap and the flower-like nanostructure give the SnS<sub>2</sub> nanoflower a good conductivity and a high surface area, which can facilitate the electron transfer of the redox probe. After the addition of high conductive IL, the Ret value of the Nafion/Hb-IL/GCE (curve c) decreased to 242.5 Ω. And for the Nafion/Hb-SnS<sub>2</sub>-IL/GCE (curve d), the smallest Ret value appeared, which was attributed to the synergistic effect of the coexistence of SnS<sub>2</sub> nanoflower and IL.
